# Supplementary material for: Electrochemical control of the morphological evolution of PEDOT on a Ni–Co(OH)2/carbon cloth surface to modulate the performance of wearable H2O2 sensors
Source: Royal Society of Chemistry journal article supplement (doi:10.1039/d3nr06503k), 2024-01-01
Supplement: d3nr06503k1.pdf [file d3nr06503k1.pdf]

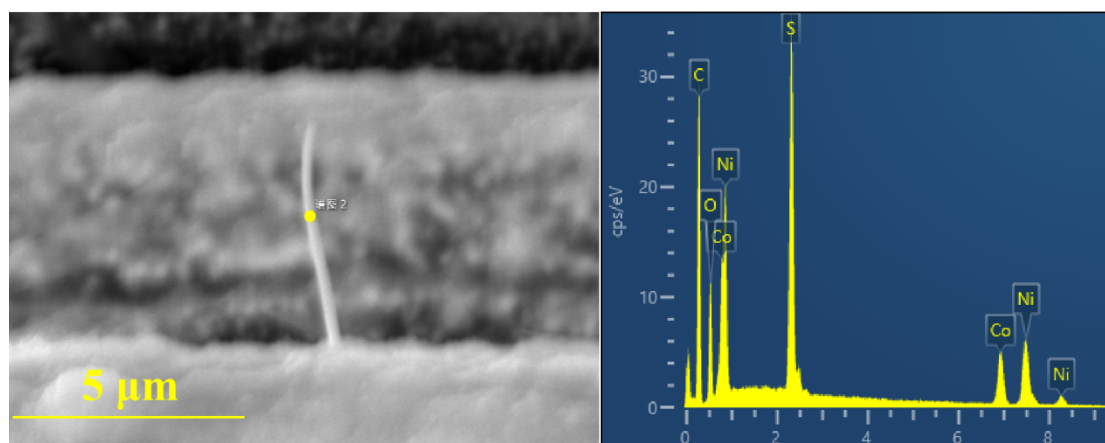

**Figure S1.** EDS point scanning energy spectrum of CPL PEDOT.

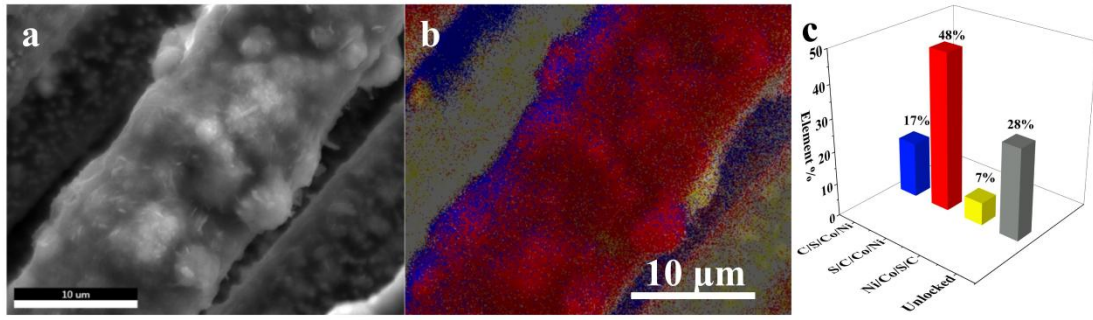

**Figure S2.** EDAX mapping of Ni-Co(OH)<sub>2</sub>/CC@PEDOT.

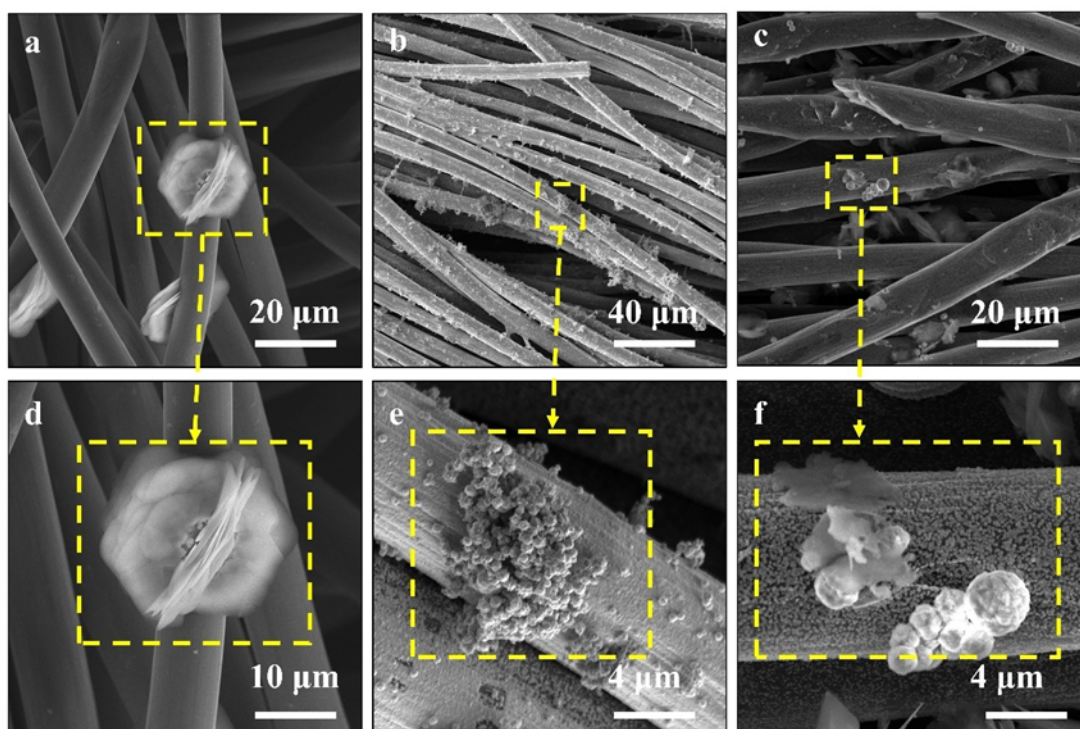

**Figure S3.** (a-c) FE-SEM images of Co(OH)<sub>2</sub>/CC, Ni/CC, and Ni-Co(OH)<sub>2</sub>/CC. (d-f) The images are partial enlargement of Figure S3 a-c.

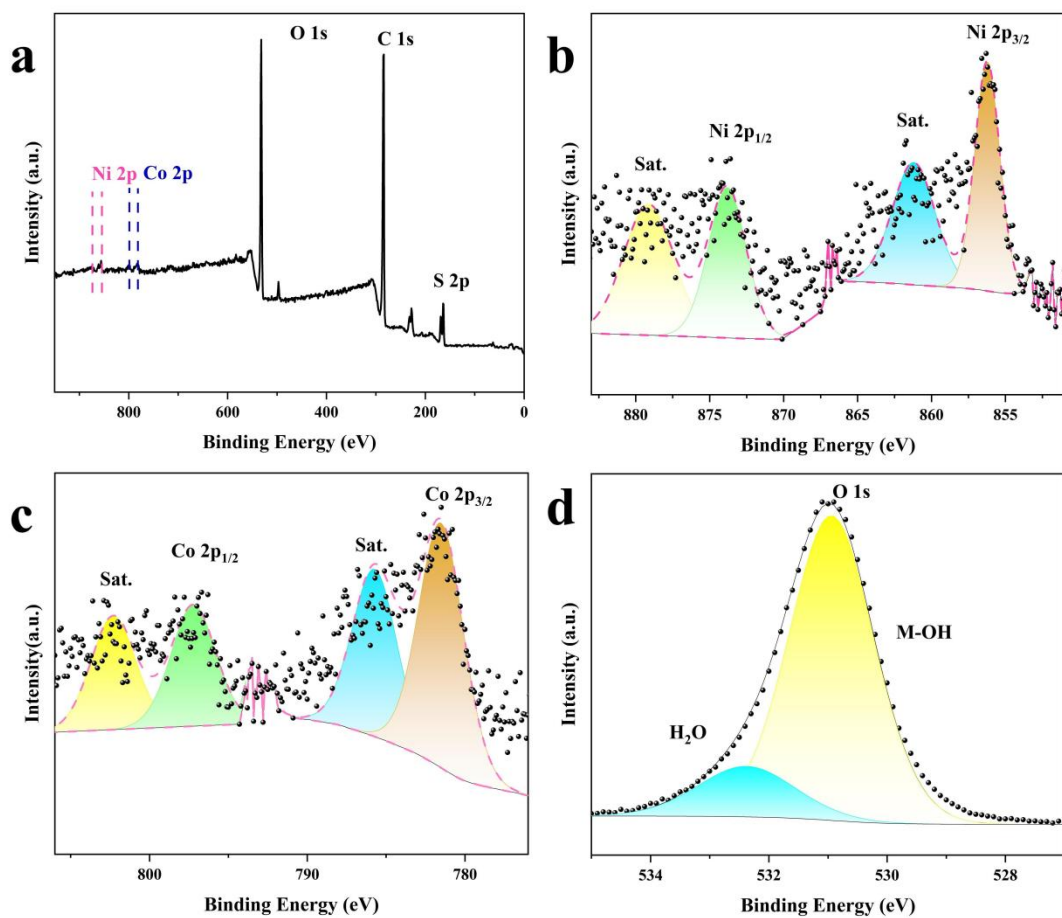

**Figure S4.** (a) The overall XPS spectrum of the Ni-Co(OH)<sub>2</sub>/CC@PEDOT composite and high-resolution spectra of (b) Co 2p, (c) Ni 2p, and (d) O 1s.

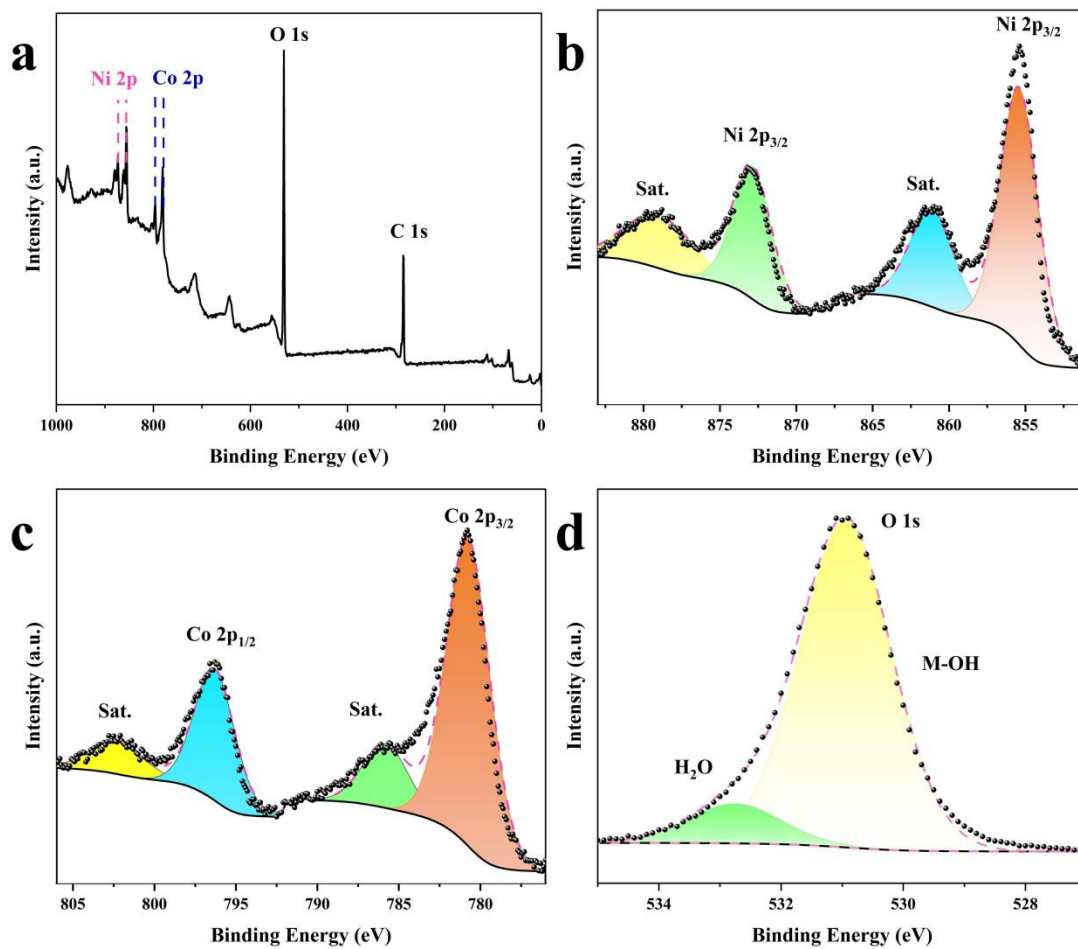

**Figure S5.** (a) The overall XPS spectrum of the Ni-Co(OH)<sub>2</sub>/CC composite and high-resolution spectra of (b) Co 2p, (c) Ni 2p, and (d) O 1s.

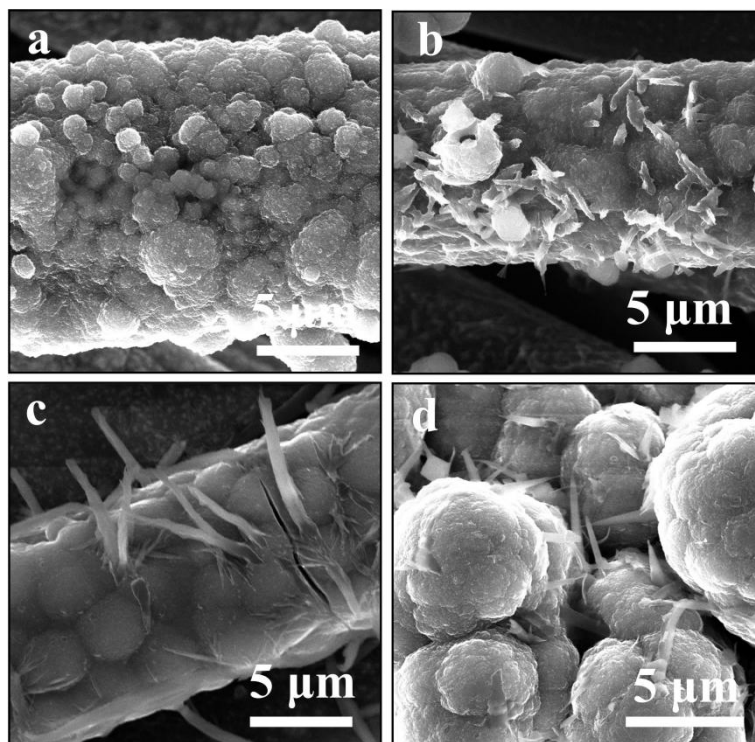

**Figure S6.** (a-d) SEM images of Ni-Co(OH)<sub>2</sub>/CC@PEDOT deposited with PEDOT at 1.0 V, 1.1 V, 1.2 V, and 1.3 V.

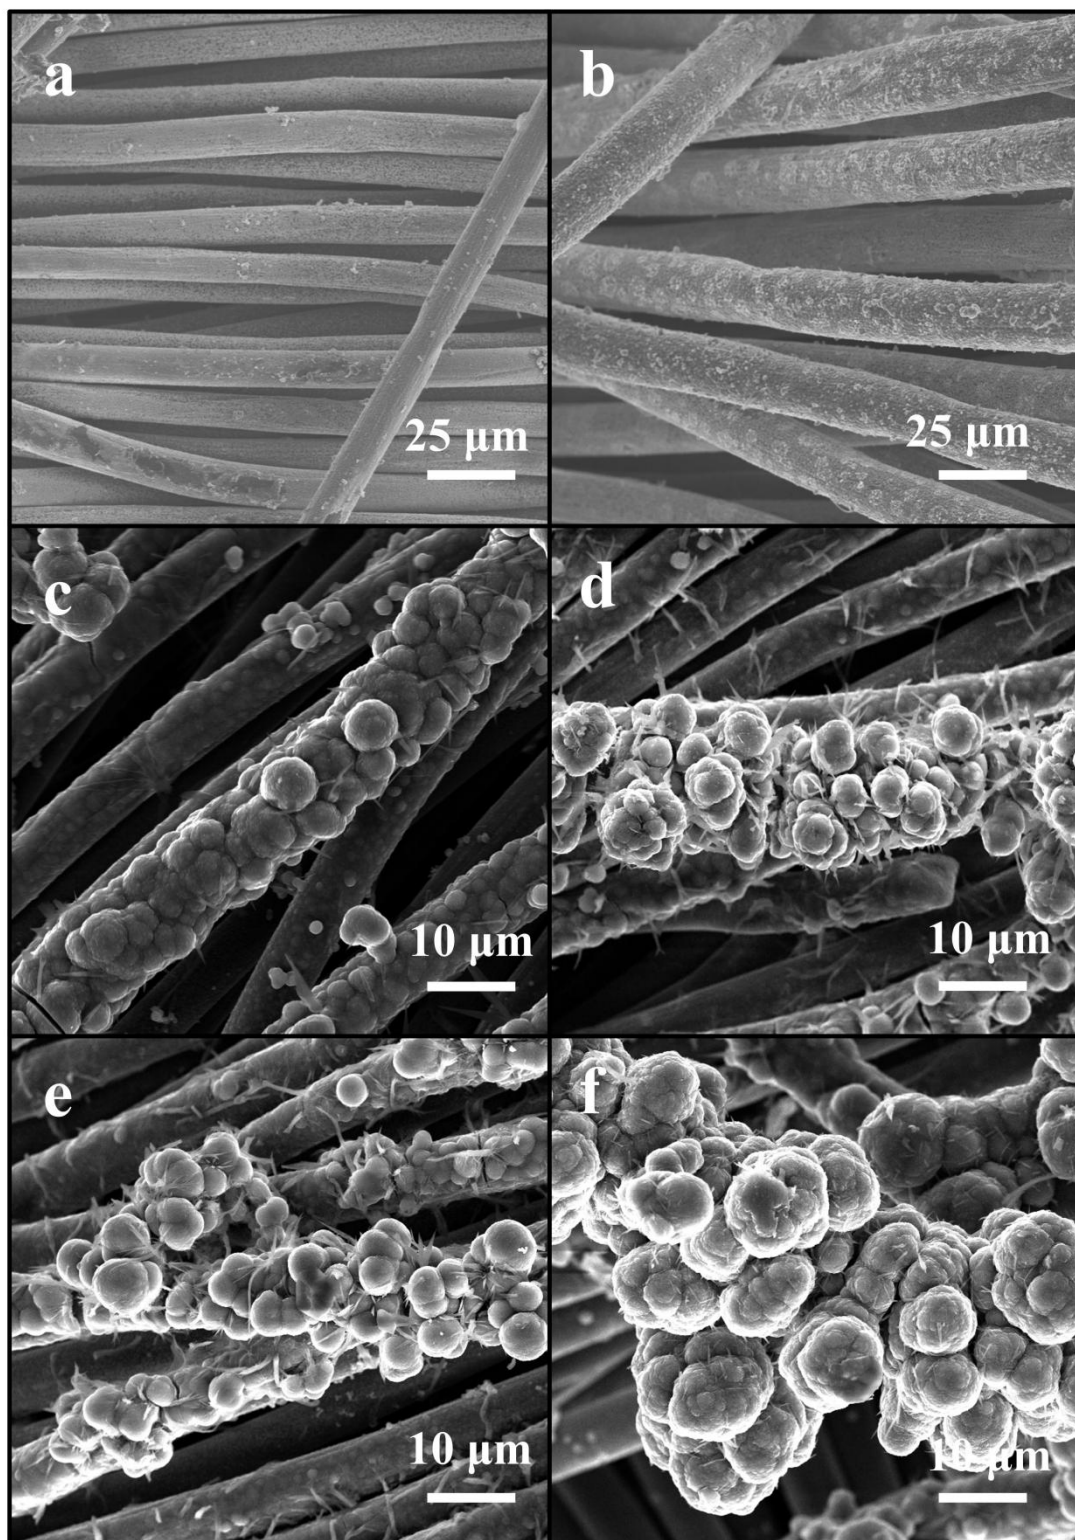

**Figure S7.** SEM images of Ni-Co(OH)<sub>2</sub>/CC@PEDOT with deposition potential of 1.2 V and different deposition time (a) 10 s, (b) 20 s, (c) 4 min, (d) 5 min, (e) 6 min, (f) 7 min.

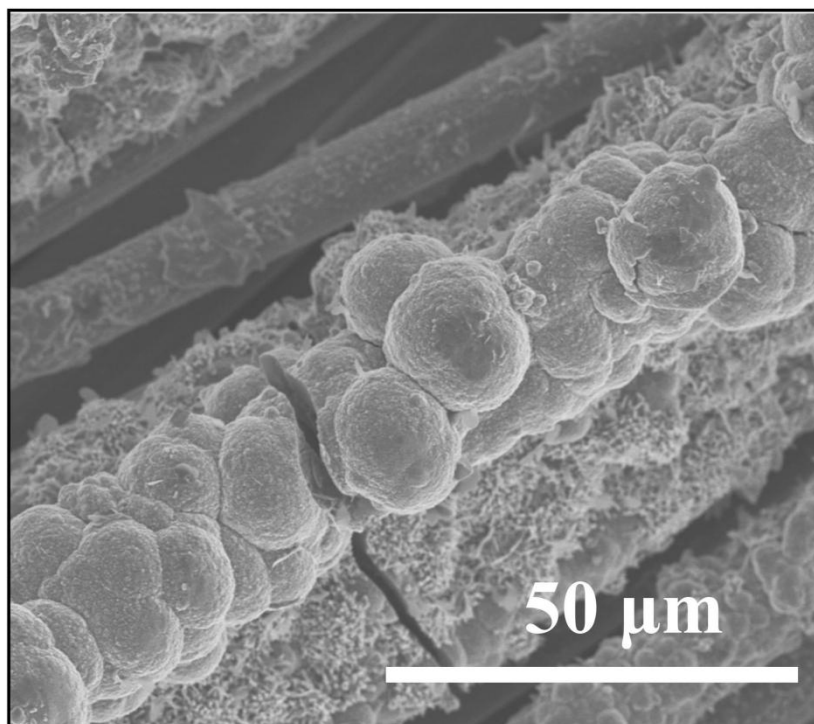

**Figure S8.** SEM images of Ni-Co(OH)<sub>2</sub>/CC@PEDOT with deposition potential of 1.2 V and time of 30 min.



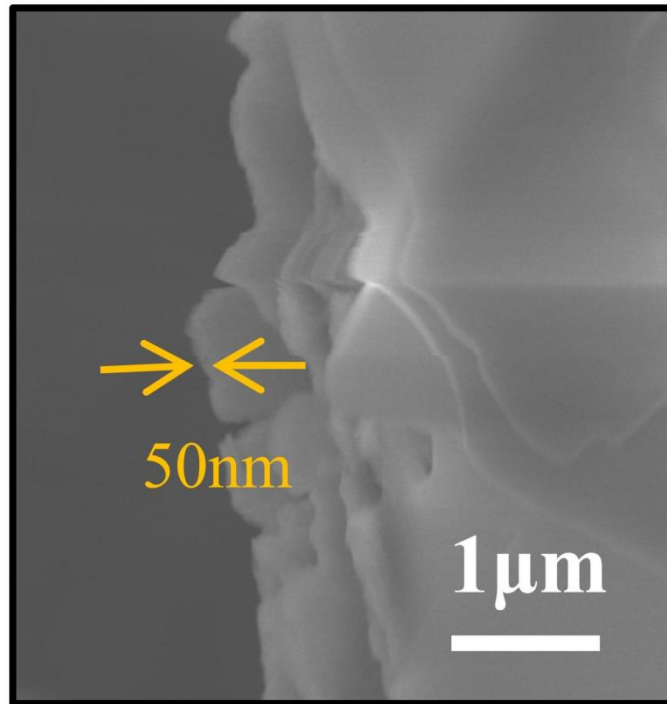

**Figure S9.** SEM images of cross-section of single CPL PEDOT.

**Table S1.** The length and average width changes of CPL PEDOT in the bending process.

| Time                            | 0 s     | 5 s     | 10 s    | 15 s    | 20 s    | 25 s    |
|---------------------------------|---------|---------|---------|---------|---------|---------|
| Average width ( $\mu\text{m}$ ) | 0.08695 | 0.08956 | 0.10022 | 0.11391 | 0.12583 | 0.13043 |
| Length ( $\mu\text{m}$ )        | 6.20043 | 5.83501 | 5.37782 | 5.22390 | 5.10500 | 4.95717 |

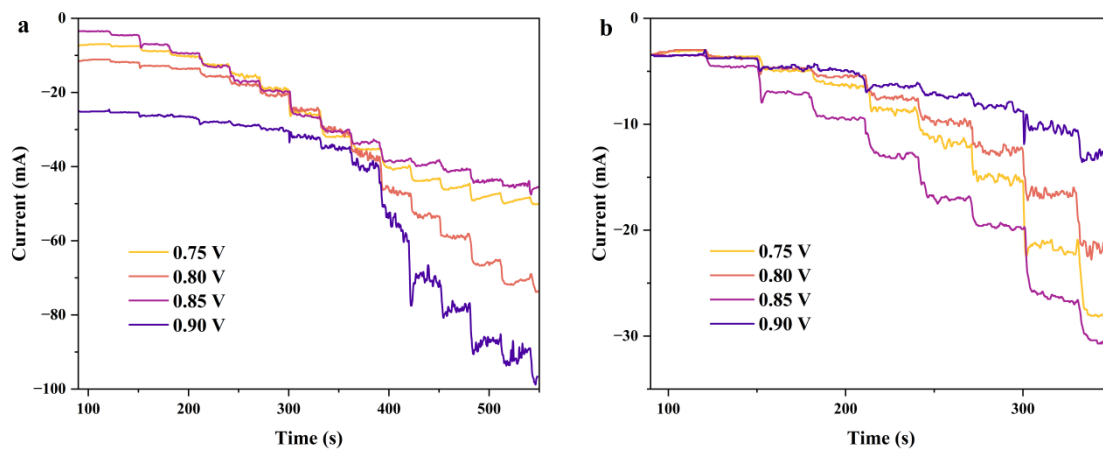

**Figure S10.** (a) The current response of Ni-Co(OH)<sub>2</sub>/CC@PEDOT electrodes with different H<sub>2</sub>O<sub>2</sub> concentrations at different potentials is continuously decline. (b) Enlarged view of the a-figure section after unification of the initial current platforms.

**Table S2.** Geometric measurement data for CPL PEDOT.

|   | Length (nm) | Width (nm) | Height (nm) | Bottom area (nm <sup>2</sup> ) | Side area (nm <sup>2</sup> ) | multiplier |
|---|-------------|------------|-------------|--------------------------------|------------------------------|------------|
| 1 | 466         | 200        | 6529        | 93200                          | 4348317                      | 46.65      |
| 2 | 516         | 180        | 4388        | 92880                          | 3054048                      | 32.88      |
| 3 | 526         | 185        | 5958        | 97310                          | 4236138                      | 43.53      |
| 4 | 1154        | 190        | 5090        | 219260                         | 6840960                      | 31.20      |
| 5 | 639         | 190        | 4625        | 121410                         | 3834125                      | 31.58      |

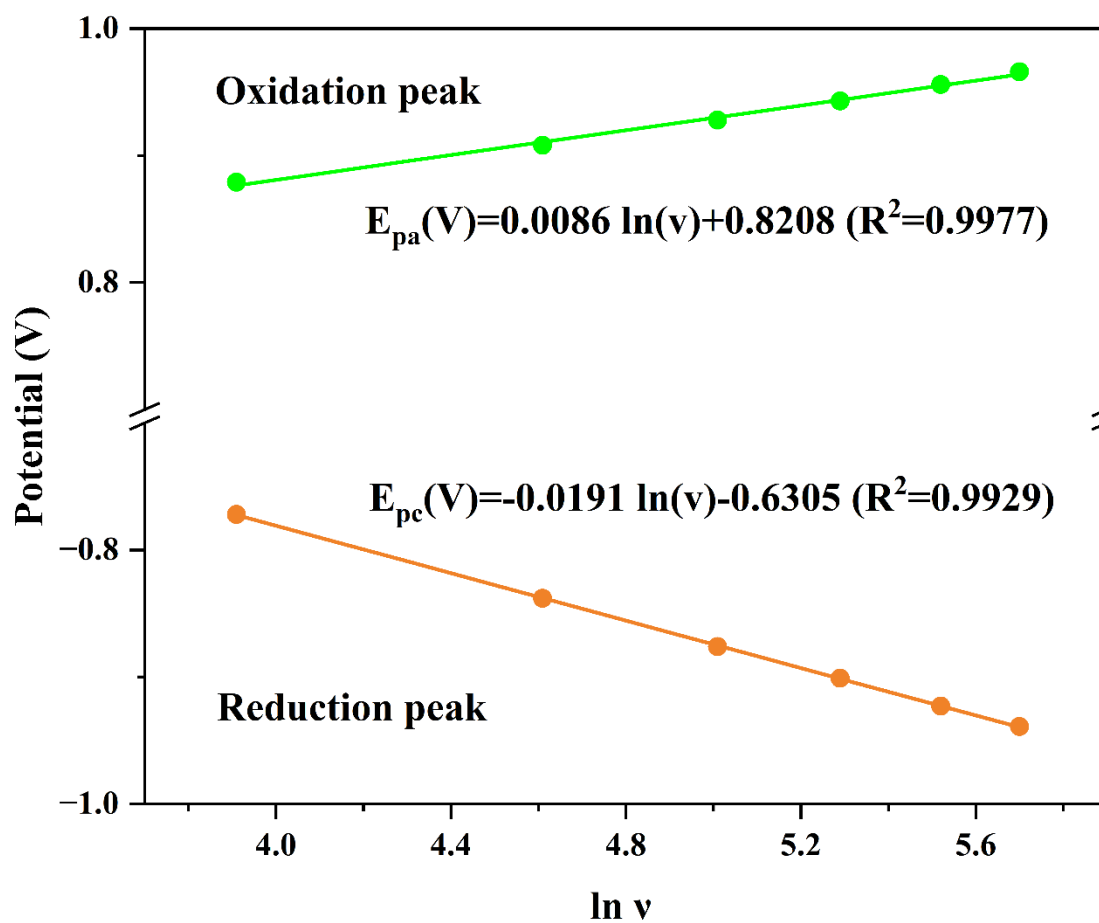

**Figure S11.** Detection of the change trend of the peak potential with the natural logarithm of the scanning rate at H<sub>2</sub>O<sub>2</sub>.

**Table S3.** EIS-related data of CC, Ni-Co(OH)<sub>2</sub>/CC, and Ni-Co(OH)<sub>2</sub>/CC@PEDOT electrodes.

| Electrodes                       | R <sub>s</sub> (Ω) | R <sub>ct</sub> (Ω) | W <sub>o</sub> -R (Ω) |
|----------------------------------|--------------------|---------------------|-----------------------|
| CC                               | 5.31               | 2.06                | 2.16                  |
| Ni-Co(OH) <sub>2</sub> /CC       | 5.57               | 1.77                | 1.49                  |
| Ni-Co(OH) <sub>2</sub> /CC@PEDOT | 5.07               | 1.59                | 0.35                  |

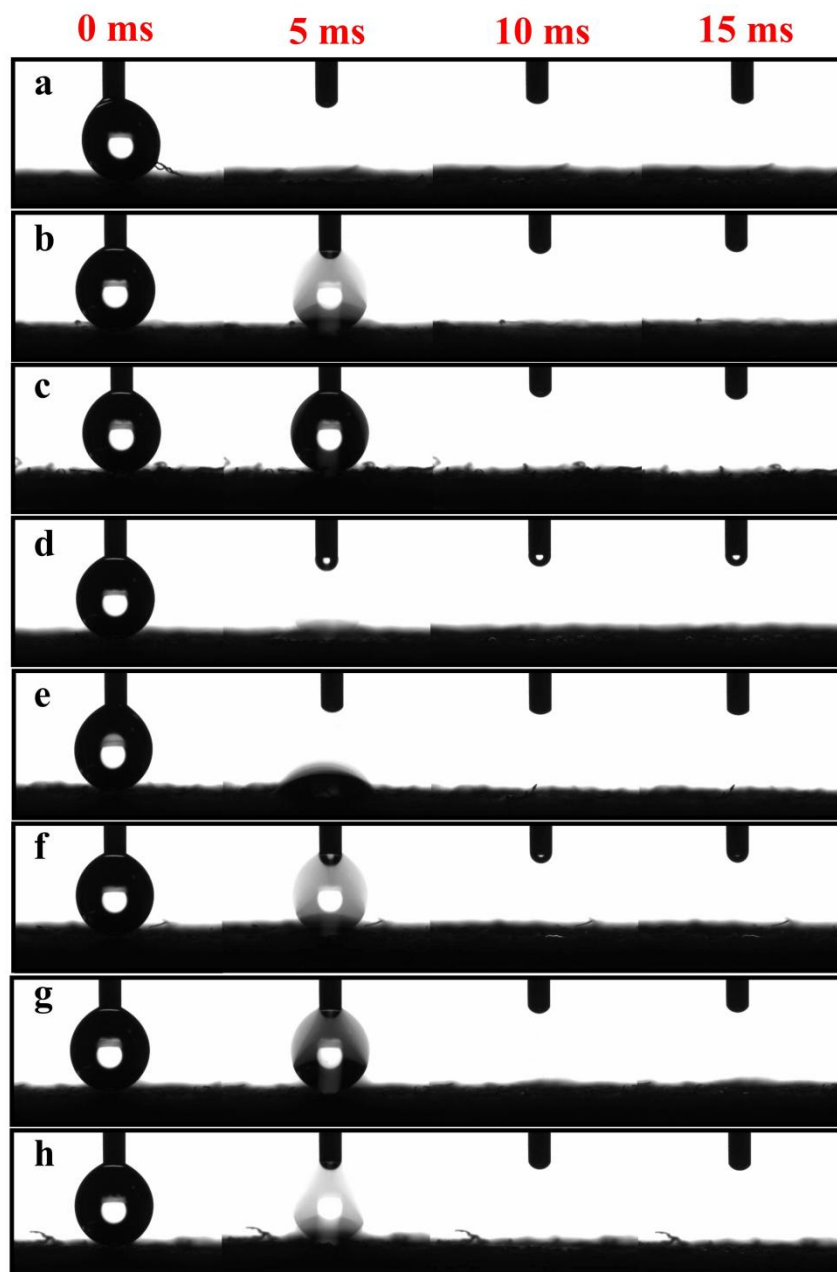

**Figure S12.** The wetting process of 5  $\mu\text{L}$  water droplets on the surface of Ni-Co(OH)<sub>2</sub>/CC@PEDOT with different electrochemical deposition parameters. (a) 1.0 V - 5 min, (b) 1.1 V - 5 min, (c) 1.3 V - 5 min, (d) 1.2 V - 3 min, (e) 1.2 V - 4 min, (f) 1.2 V - 5 min, (g) 1.2 V - 6 min, (h) 1.2 V - 7 min.

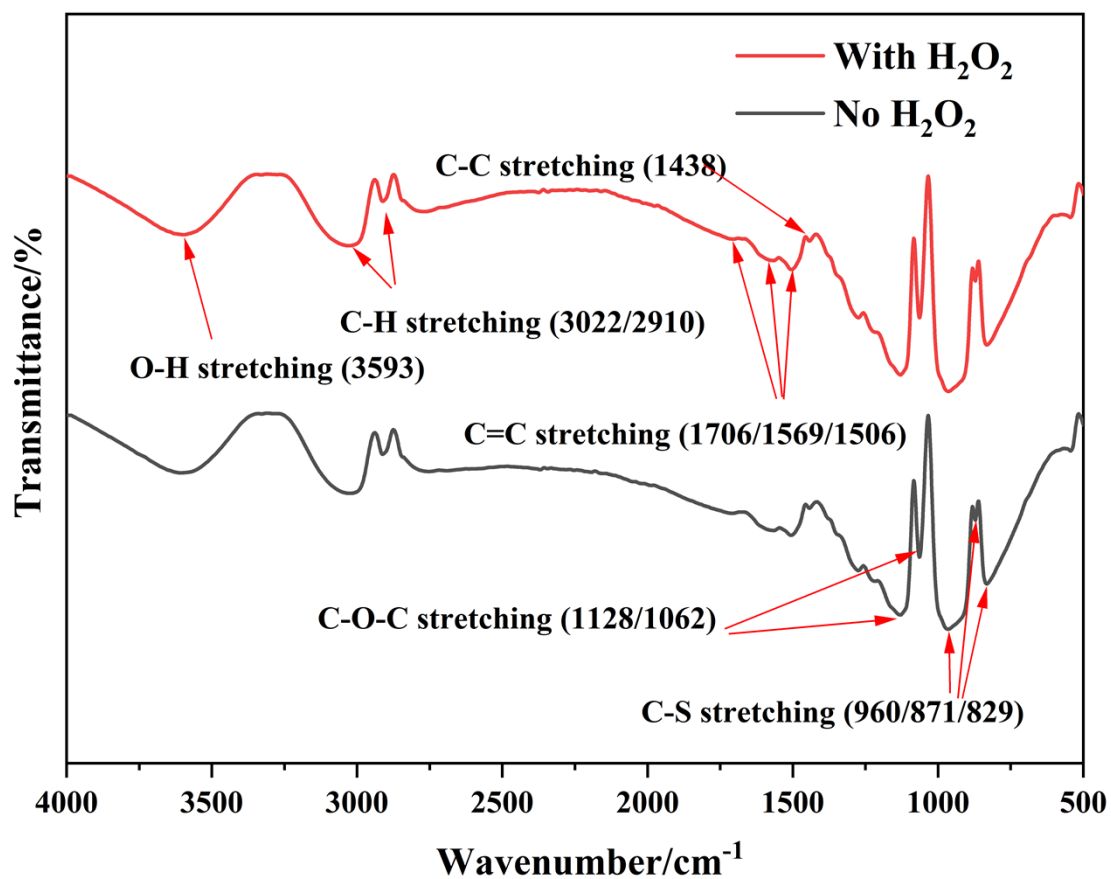

**Figure S13.** FT-IR spectra of Ni-Co(OH)<sub>2</sub>/CC@PEDOT (The red curve is obtained after the complex stay in PBS solution with 3 mM of H<sub>2</sub>O<sub>2</sub> for 10 s).



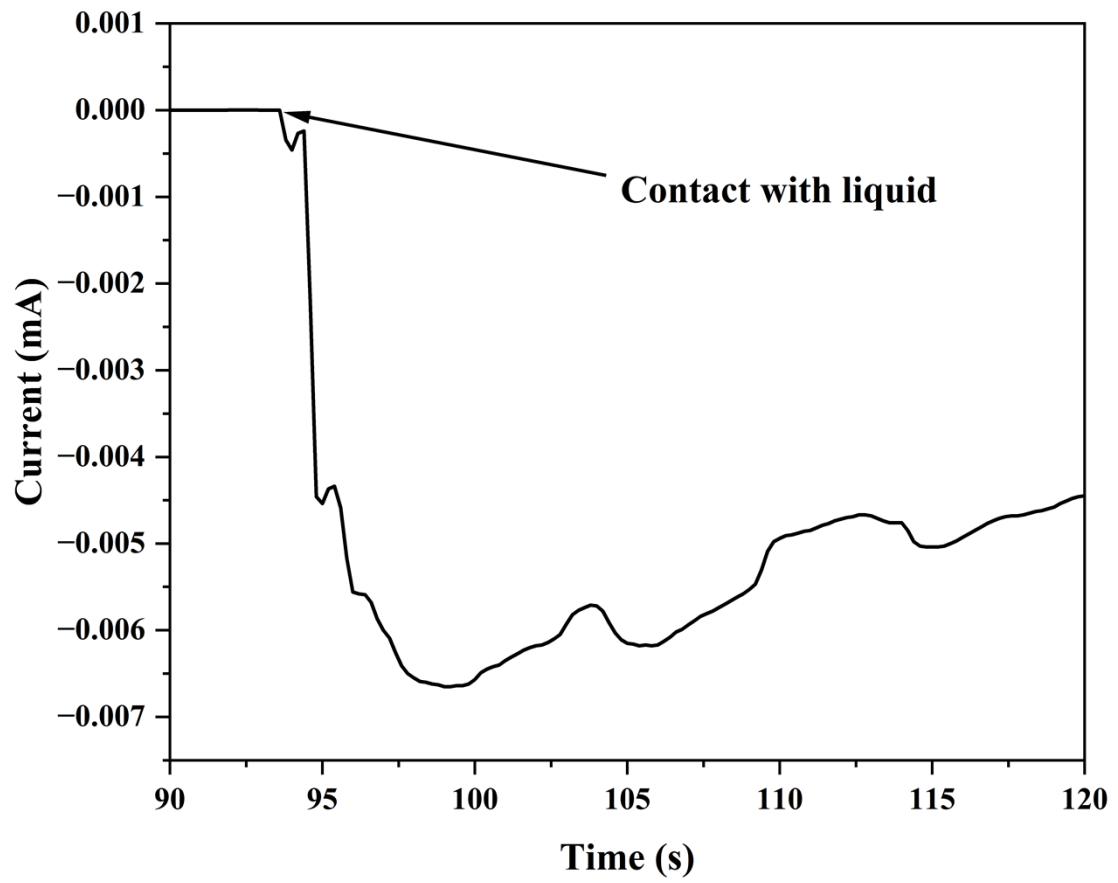

**Figure S14.** I-t curve of flexible sensors in practical measurement.
